# Supplementary material for: Effect of solvothermal synthesis parameters on the crystallite size and atomic structure of cobalt iron oxide nanoparticles
Source: Royal Society of Chemistry journal article supplement (doi:10.1039/d4na00590b), 2024-01-01
Supplement: d4na00590b1.pdf [file d4na00590b1.pdf]

### Supporting Information for

### Effect of solvothermal synthesis parameters on crystallite size and atomic structure of cobalt iron oxide nanoparticles

Olivia Aalling-Frederiksen<sup>a</sup>, Rebecca K. Pittkowski<sup>a</sup>, Andy S. Anker<sup>a</sup>, Jonathan Quinson<sup>a,b</sup>, Lars Klemeyer<sup>c</sup>, Benjamin A. Frandsen<sup>d</sup>, Dorota Koziej<sup>c</sup> and Kirsten M.Ø. Jensen<sup>\*a</sup>

<sup>a</sup> University of Copenhagen, Nano-Science Center and Department of Chemistry, 2100 Copenhagen, Denmark

<sup>b</sup> Aarhus University, Biological and Chemical Engineering Department, 8200 Aarhus, Denmark

<sup>c</sup> University of Hamburg, Institute for Nanostructure and Solid-State Physics, Center for Hybrid Nanostructures, Luruper Chausse 149, 22761 Hamburg, Germany

<sup>d</sup> Brigham Young University, Department of Physics and Astronomy, Provo, Utah 84602, USA

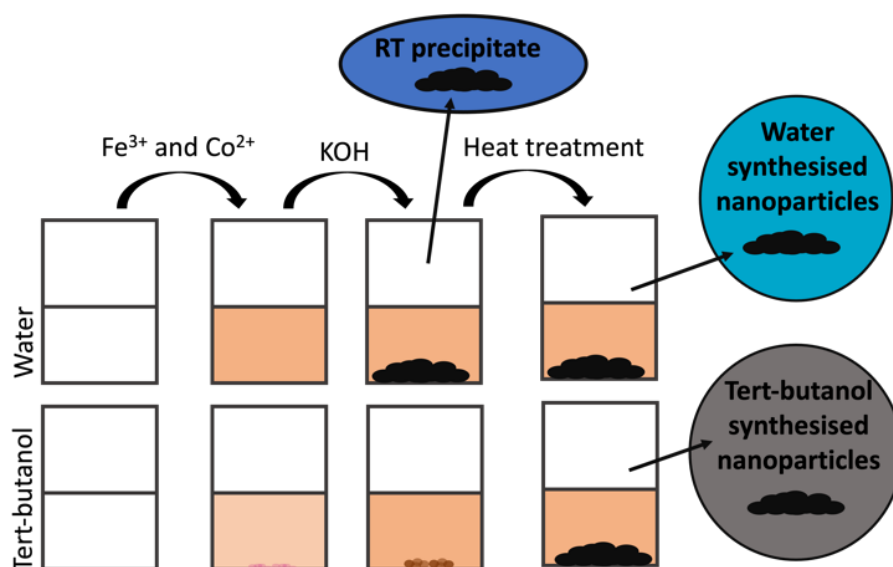

**Figure S1** Synthesis approach for the three samples investigated. The room temperature precipitate was collected before heat treatment in the synthesis approach with water.

#### PDF real space refinements

The refinement were performed using the PDFgui software<sup>1</sup> and  $\text{Fe}_3\text{O}_4$  in space group  $\text{Fd}\bar{3}\text{m}$ . For the water-synthesized nanoparticles a two-phase model with  $2x \text{Fe}_3\text{O}_4$  was used to describe the whole  $r$ -range.

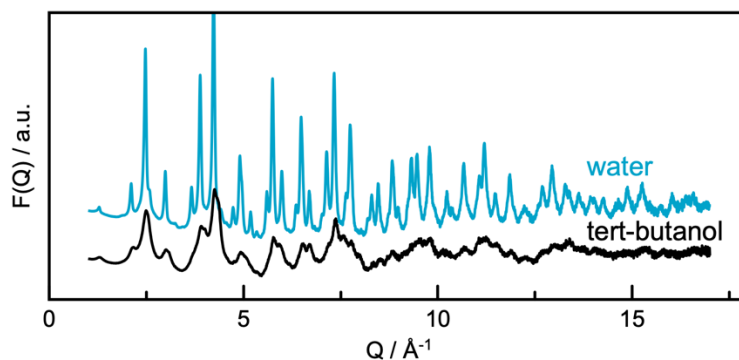

**Figure S2**  $F(Q)$  for the two samples. Data collected at an Empryean diffractometer with  $\text{Ag K}\alpha$  radiation ( $\lambda = 0.56 \text{ \AA}$ )

**Table S1** Refined parameters for PDFs collected at an Empyrean diffractometer with Ag K $\alpha$  radiation ( $\lambda = 0.56 \text{ \AA}$ )

|                                                | water<br>(single-phase) | water<br>(two-phase)   | tert-butanol<br>(single-phase) | tert-butanol<br>(two-phase) | tert-butanol<br>(two-phase) |
|------------------------------------------------|-------------------------|------------------------|--------------------------------|-----------------------------|-----------------------------|
| $\text{Fe}_3\text{O}_4$ in $\text{Fd}\bar{3}m$ |                         |                        |                                |                             |                             |
| Scale Factor                                   | 0.61 (0.013)            | 0.56 (0.014)           | 0.75 (0.038)                   | 0.73 (0.039)                | 0.71 (0.040)                |
| Scale Factor (Bulk)                            |                         | 0.080 (0.0071)         |                                | 0.03 (0.012)                | 0.04 (0.010)                |
| Fit range ( $\text{\AA}$ )                     | 1.7 $\text{\AA}$ – 100  | 1.7 $\text{\AA}$ – 100 | 1.7 $\text{\AA}$ – 30          | 1.7 $\text{\AA}$ – 30       | 1.7 $\text{\AA}$ – 30       |
| Number of refined parameters                   | 7                       | 8                      | 7                              | 8                           | 9                           |
| $R_w$                                          | 0.19                    | 0.17                   | 0.27                           | 0.26                        | 0.24                        |
| $Q_{\text{damp}} (\text{\AA}^{-1})$            | 0.011                   | 0.011                  | 0.011                          | 0.011                       | 0.011                       |
| $Q_{\text{broad}} (\text{\AA}^{-1})$           | 0.004                   | 0.004                  | 0.004                          | 0.004                       | 0.004                       |
| $Q_{\text{max}} (\text{\AA}^{-1})$             | 17                      | 17                     | 17                             | 17                          | 17                          |
| $U_{\text{iso}} (\text{\AA}^2)$ Fe/Co          | 0.012 (0.00032)         | 0.012 (0.00032)        | 0.022 (0.0016)                 | 0.021 (0.0016)              | 0.020 (0.0015)              |
| $U_{\text{iso}} (\text{\AA}^2)$ O              | 0.029 (0.0018)          | 0.030 (0.0018)         | 0.027 (0.0045)                 | 0.026 (0.0039)              | 0.026 (0.0039)              |
| O pos                                          | -0.75 (0.00085)         | -0.75 (0.00084)        | -0.75 (0.0012)                 | -0.75 (0.00076)             | -0.75 (0.00085)             |
| Lattice par., $a$ ( $\text{\AA}$ )             | 8.40 (0.00072)          | 8.40 (0.00068)         | 8.30 (0.0075)                  | 8.31 (0.0072)               | 8.28 (0.0097)               |
| Lattice par., $a$ ( $\text{\AA}$ ) (bulk)      |                         |                        |                                |                             | 8.36 (0.016)                |
| $\delta_2 (\text{\AA}^2)$                      | 3.52 (0.32)             | 3.50 (0.32)            | 3.40 (0.37)                    | 3.41 (0.3)                  | 3.36 (0.33)                 |
| Sp-diameter ( $\text{\AA}$ )                   | 85.7 (1.6)              | 66.0 (2.0)             | 23.1 (0.86)                    | 20.4 (1.1)                  | 20.0 (0.98)                 |

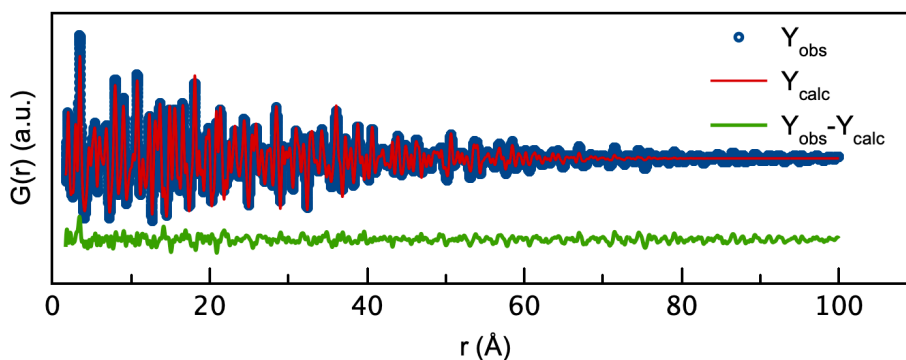**Figure S3** Refinement for the data collected for the water-synthesized nanoparticles, using a single phase,  $\text{Fe}_3\text{O}_4$  in space group  $\text{Fd}\bar{3}m$ .

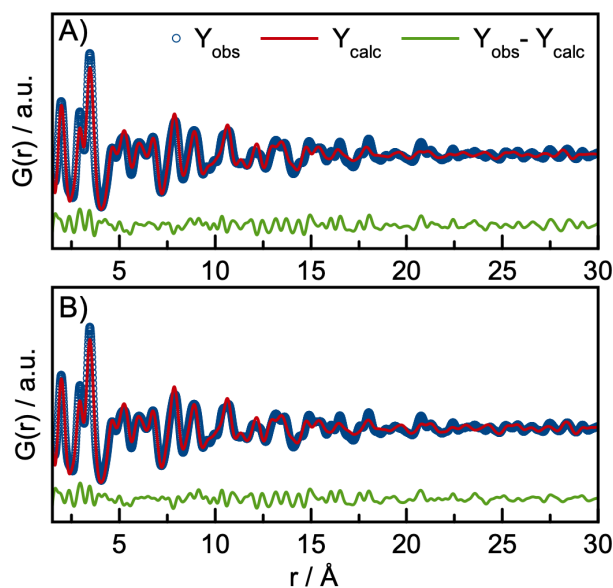

**Figure S4** Two-phase refinement of data collected for the tert-butanol synthesized nanoparticles. A) Two spinel structural models where only the scale factors are refined individually for the two phases. B) Two spinel structural models where lattice parameters and scale factors are refined individually.

**Table S2** PDF refined parameters for data collected at the I15-1 beamline at the Diamond synchrotron

|                                                       | water            | tert-butanol    |
|-------------------------------------------------------|------------------|-----------------|
| $\text{Fe}_3\text{O}_4$ in $\text{Fd}\bar{3}\text{m}$ |                  |                 |
| Scale Factor                                          | 0.25 (0.022)     | 0.39 (0.031)    |
| Scale Factor (Bulk)                                   | 0.10 (0.019)     |                 |
| Fit range (Å)                                         | 1.7 Å – 60       | 1.7 Å – 30      |
| Number of refined parameters                          | 8                | 7               |
| $R_w$                                                 | 0.12             | 0.32            |
| $Q_{\text{damp}}$ (Å <sup>-1</sup> )                  | 0.034            | 0.034           |
| $Q_{\text{broad}}$ (Å <sup>-1</sup> )                 | 0.01             | 0.01            |
| $Q_{\text{max}}$ (Å <sup>-1</sup> )                   | 27               | 27              |
| $U_{\text{iso}}$ (Å <sup>2</sup> ) Fe/Co              | 0.0075 (0.00043) | 0.013 (0.0017)  |
| $U_{\text{iso}}$ (Å <sup>2</sup> ) O                  | 0.020 (0.0026)   | 0.022 (0.0053)  |
| O pos                                                 | -0.74 (0.0013)   | -0.74 (0.00074) |
| Lattice par., $a$ (Å)                                 | 8.40 (0.0016)    | 8.30 (0.011)    |
| $\delta_2$ (Å <sup>2</sup> )                          | 3.03 (0.56)      | 3.44 (0.27)     |
| Sp-diameter (Å)                                       | 43.2 (6.0)       | 20.9 (1.4)      |

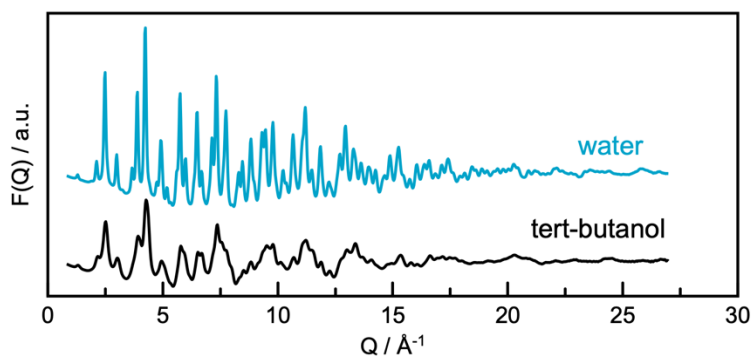

**Figure S5**  $F(Q)$  for the two samples. Data collected at I15-1 beamline at the Diamond synchrotron

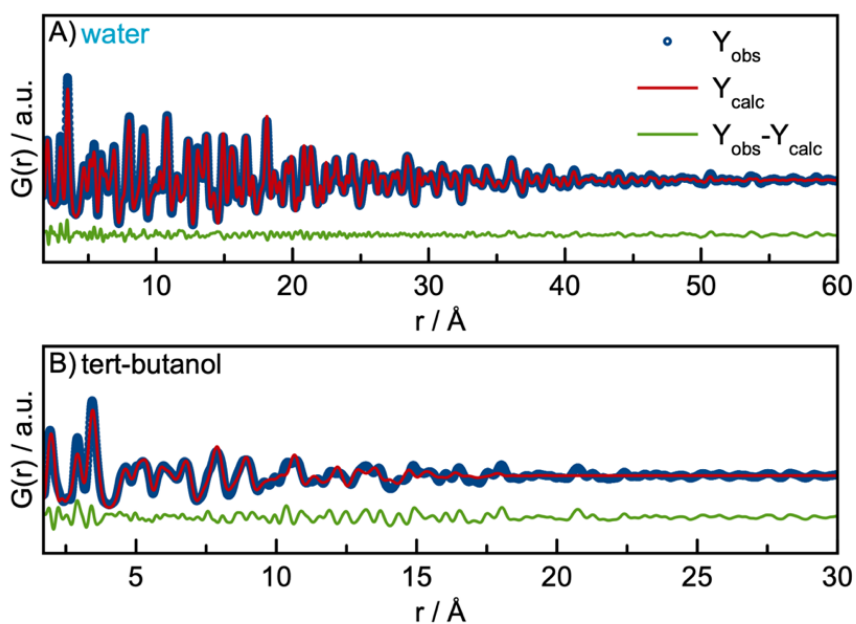

**Figure S6** PDFs using  $\text{Fe}_3\text{O}_4$  in  $\text{Fd}\bar{3}\text{m}$  as the structural starting model. Data collected at the I15-1 beamline at Diamond synchrotron. The refined parameters are shown in Table S3.

### Q-space Rietveld refinement

$\text{Fe}_3\text{O}_4$  in space group  $\text{Fd}\bar{3}\text{m}$  with origin in (0,0,0) was used as the structural starting model.

**Table S3** Rietveld refined parameter for the XRD collected on an Empyrean diffractometer with  $\text{Ag K}\alpha$  radiation ( $\lambda = 0.56 \text{ \AA}$ )

|                                                       | water                 | tert-butanol          |
|-------------------------------------------------------|-----------------------|-----------------------|
| $\text{Fe}_3\text{O}_4$ in $\text{Fd}\bar{3}\text{m}$ |                       |                       |
| Scale factor                                          | 0.212 E-06 (0.38E-08) | 0.485 E-06 (0.27E-08) |
| Y                                                     | 0.3433 (0.0075)       | 1.297 (0.0074)        |
| Lattice par., a (Å)                                   | 8.38 (0.0015)         | 8.23 (0.0018)         |
| O(x,y,z) (Å)                                          | 0.25704 (0.0011)      | 0.26153 (0.0074)      |
| $\text{B}_{\text{iso}}(\text{\AA}^2)$ (Td)            | 0.53682 (0.11)        | 1.62735 (0.053)       |
| $\text{B}_{\text{iso}}(\text{\AA}^2)$ (Oh)            | 0.69540 (0.097)       | 1.16066 (0.046)       |
| $\text{R}_{\text{wp}}$ (%)                            | 15.0                  | 11.7                  |
| Bragg R-factor                                        | 5.72                  | 4.54                  |

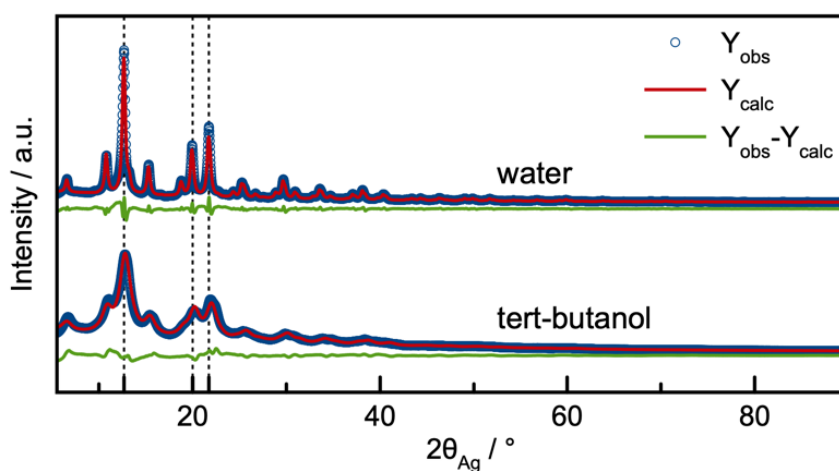

**Figure S7** Rietveld refinement of the two samples using the  $\text{Fe}_3\text{O}_4$  in space group  $\text{Fd}\bar{3}\text{m}$  as the structural starting model

## Elemental analysis with EDX

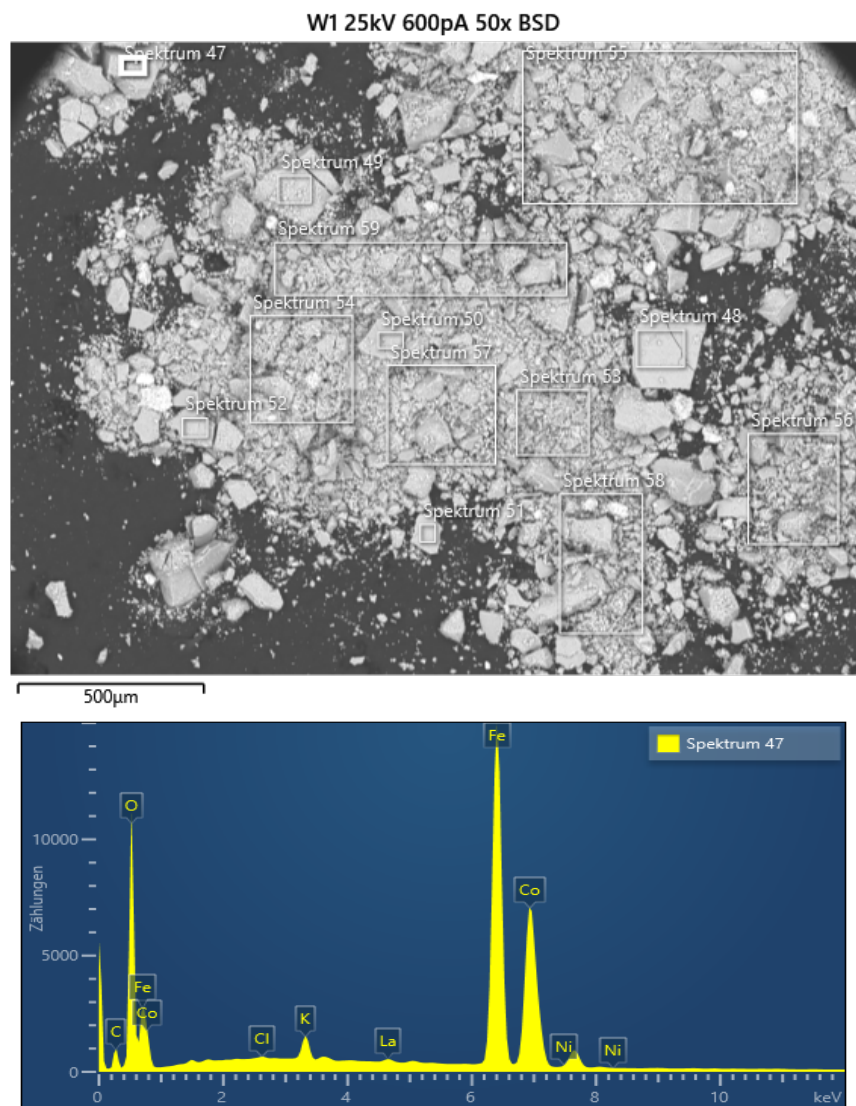

**Figure S8** EDX analysis from nanoparticles synthesized with water.

**Table S4** EDX analysis from nanoparticles synthesized with water. The composition and standard deviation were determined by averaging over 13 spectra taken across the sample.

| Results        | O            | Cl          | K           | Fe           | Co           | Ni          | La          |
|----------------|--------------|-------------|-------------|--------------|--------------|-------------|-------------|
| Max            | 48.98        | 0.23        | 1.29        | 39.50        | 20.12        | 0.50        | 2.45        |
| Min            | 37.13        | 0.02        | 0.92        | 33.15        | 16.39        | 0.17        | 0.00        |
| <b>Average</b> | <b>40.32</b> | <b>0.09</b> | <b>1.08</b> | <b>38.07</b> | <b>19.03</b> | <b>0.28</b> | <b>1.12</b> |
| SD             | 2.91         | 0.05        | 0.14        | 1.59         | 0.92         | 0.10        | 0.94        |

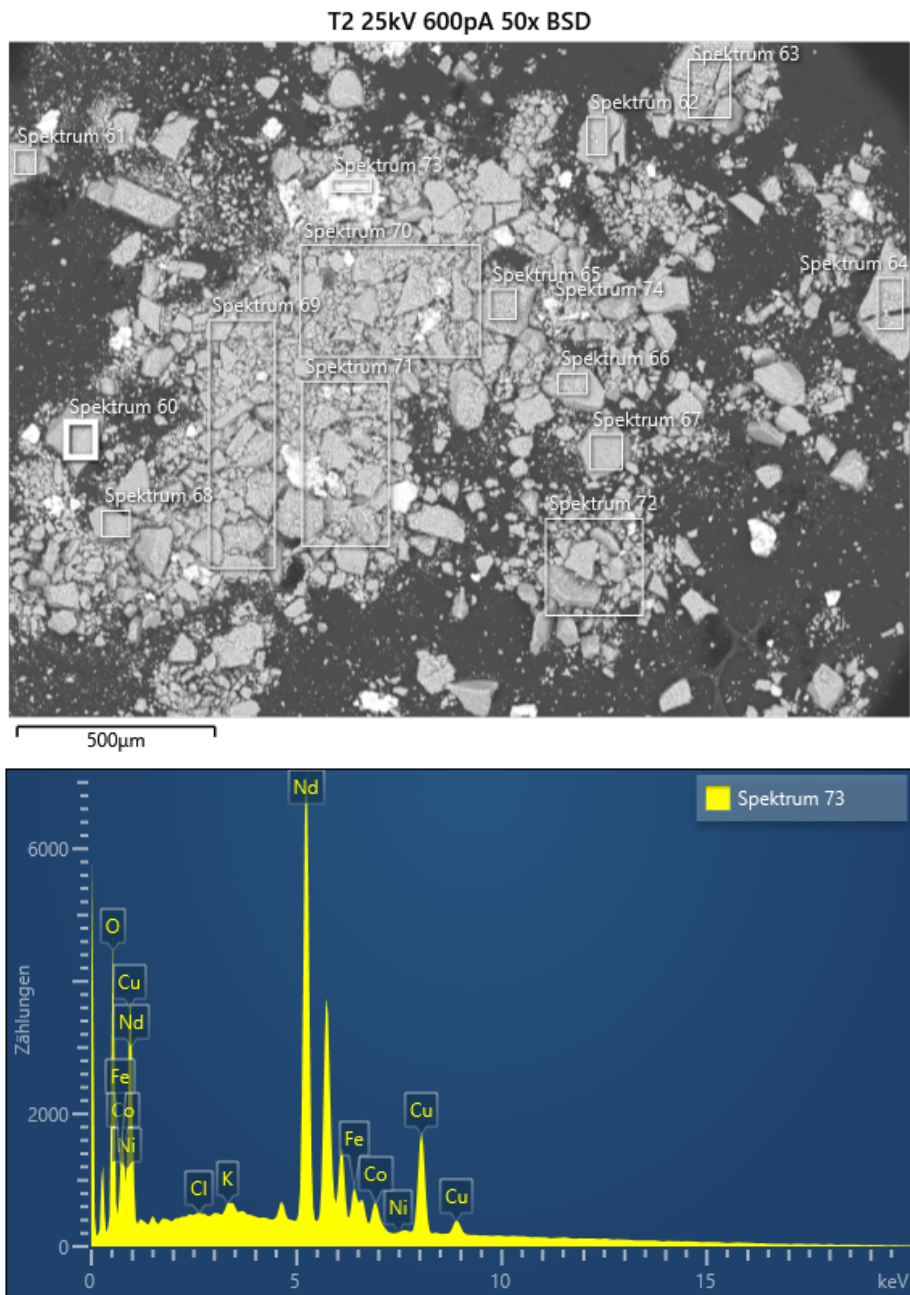

**Figure S9** EDX analysis from nanoparticles synthesized with tert-butanol.

**Table S5** EDX analysis from nanoparticles synthesized with tert-butanol. The composition and standard deviation were determined by averaging over 13 spectra taken across the sample.

| Results        | O            | Cl          | K           | Fe           | Co           | Ni          |
|----------------|--------------|-------------|-------------|--------------|--------------|-------------|
| Max            | 55.39        | 0.18        | 4.82        | 40.64        | 20.88        | 0.35        |
| Min            | 36.57        | 0.00        | 3.73        | 26.84        | 13.85        | 0.04        |
| <b>Average</b> | <b>43.46</b> | <b>0.08</b> | <b>4.19</b> | <b>34.86</b> | <b>17.19</b> | <b>0.22</b> |
| SD             | 5.10         | 0.05        | 0.31        | 3.62         | 1.64         | 0.10        |

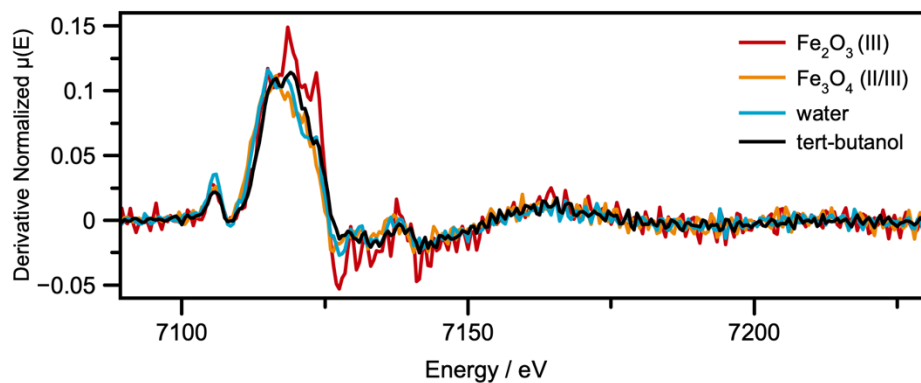

**Figure S10** Derivative of the Fe K-edge XAS spectra for the water and tert-butanol synthesized nanoparticles with references  $\gamma\text{-Fe}_2\text{O}_3$  (maghemite) and  $\text{Fe}_3\text{O}_4$  (magnetite) reference spectra.

**TEM**

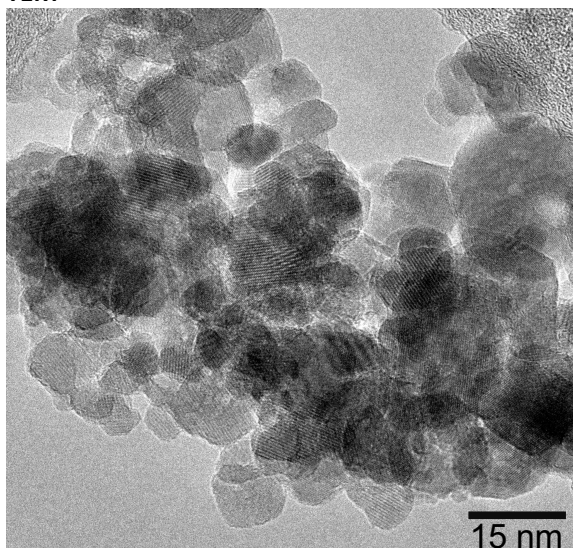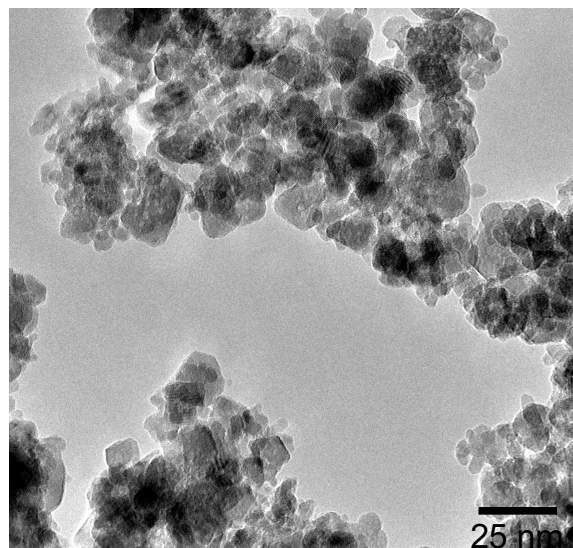

**Figure S11** TEM micrographs for the water-synthesized nanoparticles

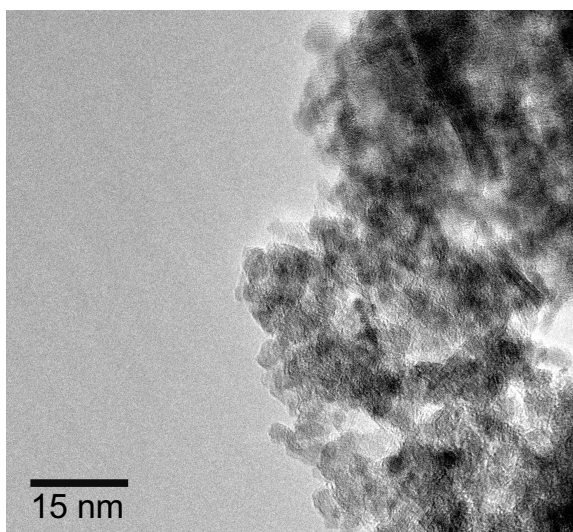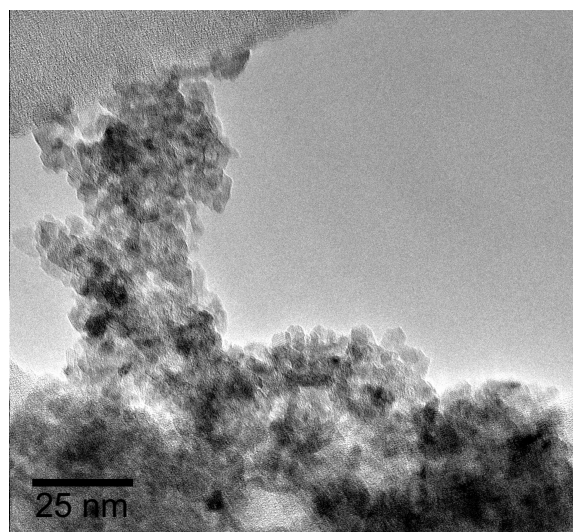

**Figure S12** TEM micrographs for the tert-butanol synthesized nanoparticles

SAXS

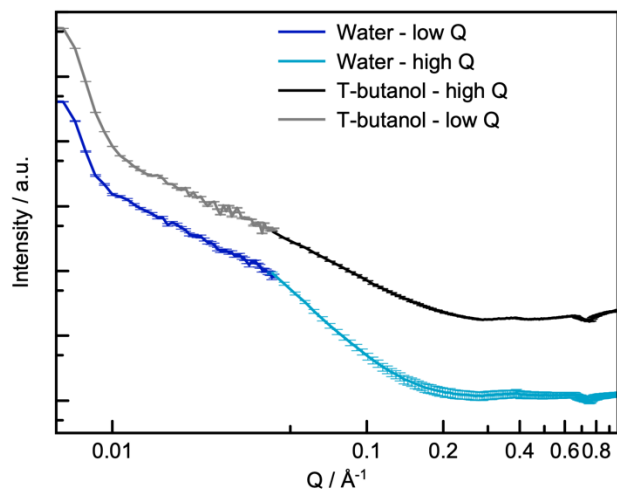

Figure S13 SAXS patterns of the water and tert-butanol synthesized nanoparticles.

Table S6 Refined parameters from SAXS refinement shown in Figure 4.

|                                     | water                                       | tert-butanol                                |
|-------------------------------------|---------------------------------------------|---------------------------------------------|
| Fitting range ( $\text{\AA}^{-1}$ ) | 0.01 – 0.3                                  | 0.01 – 0.3                                  |
| Dimension, a, $Q^{-a}$              | 4                                           | 4                                           |
| lqscale                             | 0.0052 (0.062)                              | 0.0017 (0.027)                              |
| Powerscale                          | $1.4 \cdot 10^{-8}$ ( $3.9 \cdot 10^{-7}$ ) | $8.8 \cdot 10^{-8}$ ( $3.4 \cdot 10^{-7}$ ) |
| background                          | 0.0013 (0.034)                              | 0.020 (0.029)                               |
| Mean Radius (nm)                    | 7.7 (2.3)                                   | 4.1 (0.36)                                  |
| Polydispersity                      | 0.33 (0.0041)                               | 0.36 (0.00053)                              |

Neutron total scattering

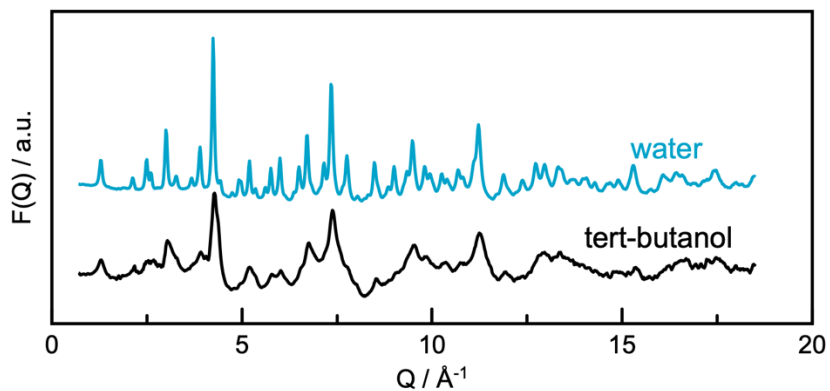

Figure S14 F(Q) for the two samples. Data collected at the Nomad beamline.



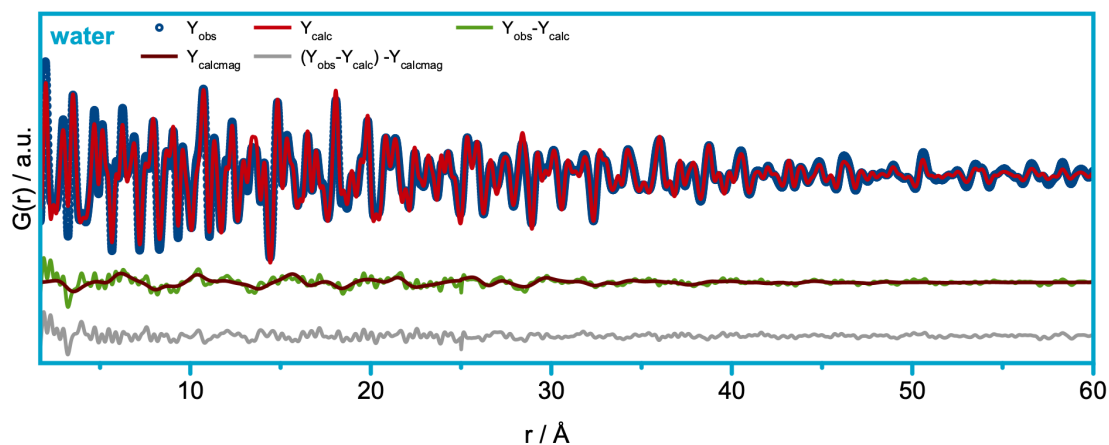

**Figure S15** Neutron PDF (nPDF) and refinements using the  $\text{CoFe}_2\text{O}_4$  spinel structure in space-group  $\text{Fd}\bar{3}\text{m}$  for the water-synthesized nanoparticles. Here the magnetic PDF is furthermore refined as the difference curve using a collinear model.

**Table S7** Refined parameters from nPDF refinements presented in Figure 5.

|                                                         | water                 | tert-butanol          |
|---------------------------------------------------------|-----------------------|-----------------------|
| $\text{CoFe}_2\text{O}_4$ in $\text{Fd}\bar{3}\text{m}$ |                       |                       |
| Scale Factor                                            | 0.024 (0.013)         | 0.049 (0.03)          |
| Fit range ( $\text{\AA}$ )                              | 1.5 $\text{\AA}$ – 60 | 1.5 $\text{\AA}$ – 30 |
| Number of refined parameters                            | 8                     | 8                     |
| $R_w$                                                   | 0.21                  | 0.38                  |
| $Q_{\text{damp}}$ ( $\text{\AA}^{-1}$ )                 | 0.018                 | 0.018                 |
| $Q_{\text{broad}}$ ( $\text{\AA}^{-1}$ )                | 0.019                 | 0.019                 |
| $Q_{\text{max}}$ ( $\text{\AA}^{-1}$ )                  | 18.5                  | 18.5                  |
| $U_{\text{iso}}$ ( $\text{\AA}^2$ ) Fe/Co               | 0.006 (0.0085)        | 0.0067 (0.014)        |
| $U_{\text{iso}}$ ( $\text{\AA}^2$ ) O                   | 0.009 (0.016)         | 0.016 (0.031)         |
| O pos                                                   | -0.74 (0.0079)        | -0.74 (0.01)          |
| Lattice par., $a$ ( $\text{\AA}$ )                      | 8.38 (0.020)          | 8.31 (0.072)          |
| $\delta_2$ ( $\text{\AA}^2$ )                           | 3.30 (6.0)            | 3.30 (3.7)            |
| Sp-diameter ( $\text{\AA}$ )                            | 84.4 (61)             | 22.3 (11)             |
| $\text{Fe}_{\text{Td}}$ occ                             | 0.57 (0.63)           | 0.46 (0.62)           |

**Table S8** Refined parameters for the mPDF refinement for the water-synthesized nanoparticles

|                                                    | Water      | Tert-butanol |
|----------------------------------------------------|------------|--------------|
| $R_w$                                              | 0.698      | 0.920        |
| Sp-diameter ( $\text{\AA}$ )                       | 63.5 (3.1) | 20.6 (1.4)   |
| Ordered moment averaged over all sites ( $\mu_B$ ) | 3.83 (13)  | 3.6 (3)      |
| Ratio of octahedral moment to tetrahedral moment   | 0.74 (4)   | 0.50 (6)     |

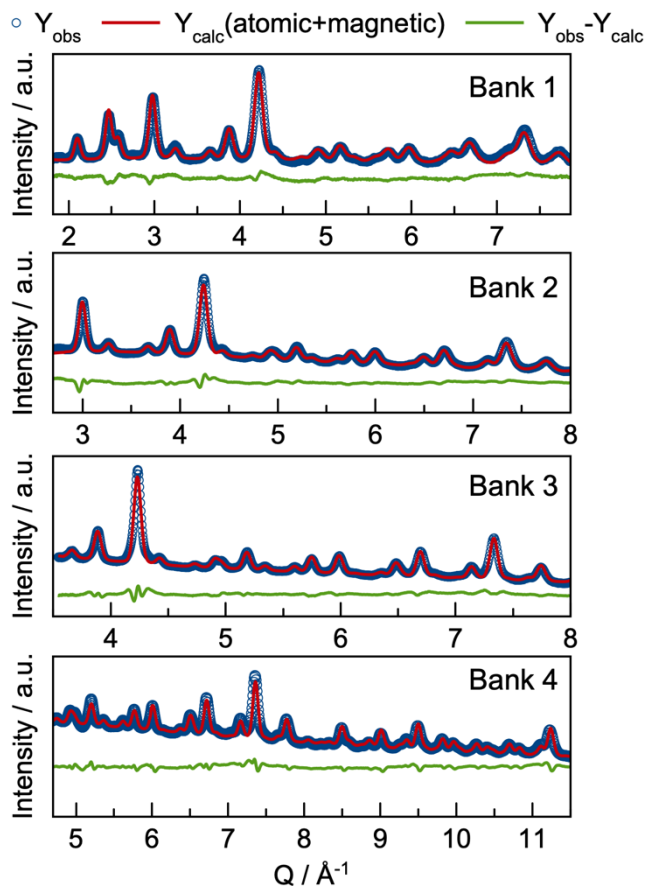

**Figure S16** Rietveld refinements of the neutron scattering data collected for the water-synthesized nanoparticles.

**Table S9** Refined parameters from Rietveld refinement of neutron scattering data for the water-synthesized nanoparticles.

|                                                    | water                               |
|----------------------------------------------------|-------------------------------------|
| CoFe <sub>2</sub> O <sub>4</sub> in Fd $\bar{3}$ m |                                     |
| <b>Crystal structure:</b>                          |                                     |
| Lattice par., $a$ (Å)                              | 8.38 (0.00040)                      |
| Oxygen position                                    | 0.257 (0.00022)                     |
| B <sub>iso</sub> Co/Fe (8a)                        | 0.600 (0.071)                       |
| B <sub>iso</sub> Co/Fe (16d)                       | 0.600 (0.071)                       |
| B <sub>iso</sub> O                                 | 0.500                               |
| Fe <sub>Td</sub> occ                               | 0.37 (0.013)                        |
| Co <sub>Td</sub> occ                               | 0.63 (0.013)                        |
| Fe <sub>Oh</sub> occ                               | 0.63 (0.013)                        |
| Co <sub>Oh</sub> occ                               | 1.38 (0.013)                        |
| <b>Magnetic structure:</b>                         |                                     |
| Easy-axis                                          | <100>                               |
| $\mu_{tet}$ ( $\mu_B$ )                            | -3.46 (0.24)                        |
| $\mu_{oct}$ ( $\mu_B$ )                            | 3.44 (0.19)                         |
| <b>Fit quality</b>                                 |                                     |
| R <sub>Bragg</sub> (%)                             | Bank 1/2/3/4<br>7.27/7.71/8.61/11.8 |
| R <sub>F</sub> (%)                                 | 9.36/6.44/8.78/9.75                 |
| R <sub>magnetic</sub> (%)                          | 3.68/6.70/15.7/10.9                 |

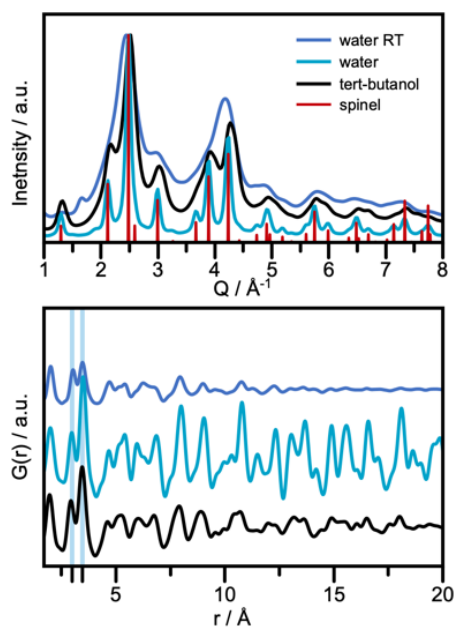

**Figure S17** Comparison of the X-ray scattering data collected for the nanoparticles formed under different synthesis conditions. Solvothermal synthesis using water and tert-butanol. And synthesis collecting the precipitate in water at room temperature.

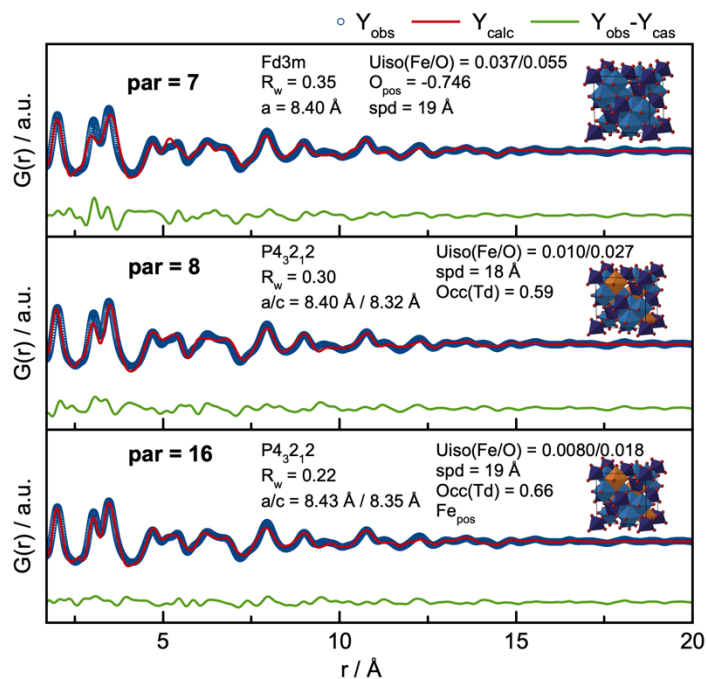

**Figure S18** PDFs collected for the nanoparticles formed during co-precipitation. Refinement with two different spinel structures in space group  $Fd\bar{3}m$  and  $P4_32_12$  respectively.

**Table S10** Refined parameters from PDF refinements of the water room temperature sample presented in Figure 6 and S17.

|                                          | $\text{Fe}_3\text{O}_4$ in $\text{Fd}\bar{3}\text{m}$ | $\text{Fe}_3\text{O}_4$ in $\text{P4}_32_12$ | $\text{Fe}_3\text{O}_4$ in $\text{P4}_32_12$ |
|------------------------------------------|-------------------------------------------------------|----------------------------------------------|----------------------------------------------|
| Scale Factor (Bulk)                      | 0.47 (0.049)                                          | 0.53 (0.058)                                 | 0.53 (0.057)                                 |
| Fit range                                | 1.7 Å – 20 Å                                          | 1.7 Å – 20 Å                                 | 1.7 Å – 20 Å                                 |
| Number of refined parameters             | 7                                                     | 8                                            | 16                                           |
| $R_w$                                    | 0.35                                                  | 0.30                                         | 0.23                                         |
| $Q_{\text{damp}}$ (Å <sup>-1</sup> )     | 0.044                                                 | 0.044                                        | 0.044                                        |
| $Q_{\text{broad}}$ (Å <sup>-1</sup> )    | 0.01                                                  | 0.01                                         | 0.01                                         |
| $Q_{\text{max}}$ (Å <sup>-1</sup> )      | 20                                                    | 20                                           | 20                                           |
| $U_{\text{iso}}$ (Å <sup>2</sup> ) Fe/Co | 0.037 (0.0054)                                        | 0.009 (0.0022)                               | 0.007 (0.0031)                               |
| $U_{\text{iso}}$ (Å <sup>2</sup> ) O     | 0.005 (0.003)                                         | 0.027 (0.0088)                               | 0.022 (0.0089)                               |
| O pos                                    | -0.75 (0.00092)                                       |                                              |                                              |
| Fe pos                                   |                                                       |                                              | 0.23 (0.0063)                                |
|                                          |                                                       |                                              | 0.52 (0.0068)                                |
|                                          |                                                       |                                              | 0.14 (0.0087)                                |
|                                          |                                                       |                                              | 0.13 (0.0065)                                |
|                                          |                                                       |                                              | 0.86 (0.0059)                                |
|                                          |                                                       |                                              | 0.62 (0.0073)                                |
|                                          |                                                       |                                              | 0.27 (0.0053)                                |
|                                          |                                                       |                                              | 0.64 (0.0012)                                |
| Lattice par., $a$ (Å)                    | 8.41 (0.019)                                          | 8.44 (0.067)                                 | 8.43 (0.051)                                 |
| Lattice par., $c$ (Å)                    |                                                       | 8.32 (0.14)                                  | 8.35 (0.11)                                  |
| $\delta_2$ (Å <sup>2</sup> )             | 3.53 (0.43)                                           | 3.04 (0.41)                                  | 3.45 (0.77)                                  |
| Sp-diameter (Å)                          | 19.5 (1.7)                                            | 18.0 (1.6)                                   | 18.6 (1.6)                                   |
| Occ(Td)                                  |                                                       | 0.59 (0.059)                                 | 0.66 (0.075)                                 |

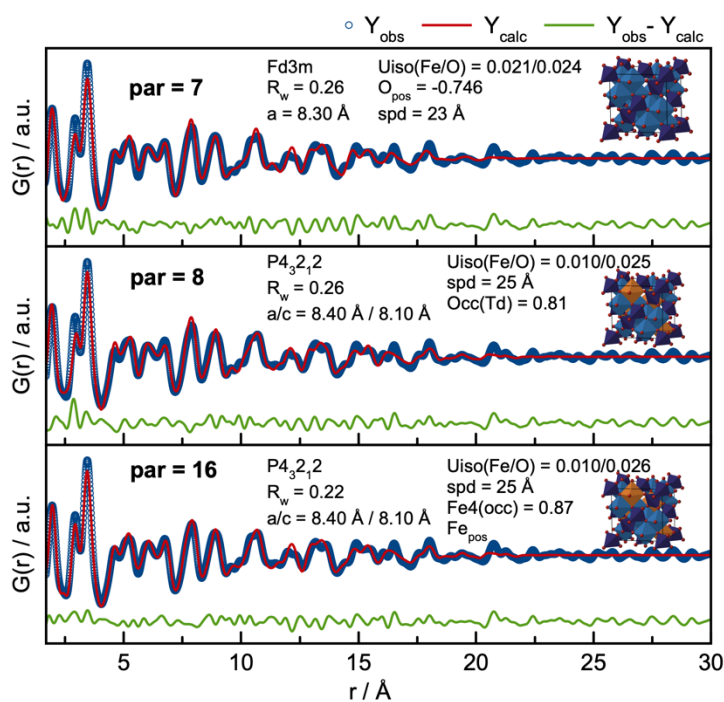

**Figure S19** Refinement of the PDF from the tert-butanol-synthesized nanoparticles with two different spinel structures in space group  $\text{Fd}\bar{3}\text{m}$  and  $\text{P4}_32_12$  respectively.

**Table S11** Refined parameters from PDF refinements of tert-butanol-synthesized nanoparticles presented in Figure S18.

|                                              | <b>Fe<sub>3</sub>O<sub>4</sub> in Fd3m</b> | <b>Fe<sub>3</sub>O<sub>4</sub> in P4<sub>3</sub>2<sub>1</sub>2</b> | <b>Fe<sub>3</sub>O<sub>4</sub> in P4<sub>3</sub>2<sub>1</sub>2</b> |
|----------------------------------------------|--------------------------------------------|--------------------------------------------------------------------|--------------------------------------------------------------------|
| <b>Scale Factor (Bulk)</b>                   | 0.75 (0.038)                               | 0.79 (0.044)                                                       | 0.81 (0.047)                                                       |
| <b>Fit range (Å)</b>                         | 1.7 Å – 30                                 | 1.7 Å – 30                                                         | 1.7 Å – 30                                                         |
| <b>Number of refined parameters</b>          | 7                                          | 8                                                                  | 16                                                                 |
| <b>R<sub>w</sub></b>                         | 0.27                                       | 0.26                                                               | 0.22                                                               |
| <b>Q<sub>damp</sub> (Å<sup>-1</sup>)</b>     | 0.011                                      | 0.011                                                              | 0.011                                                              |
| <b>Q<sub>broad</sub> (Å<sup>-1</sup>)</b>    | 0.004                                      | 0.004                                                              | 0.004                                                              |
| <b>Q<sub>max</sub> (Å<sup>-1</sup>)</b>      | 17                                         | 17                                                                 | 17                                                                 |
| <b>U<sub>iso</sub> (Å<sup>2</sup>) Fe/Co</b> | 0.022 (0.0016)                             | 0.010 (0.0013)                                                     | 0.010 (0.0019)                                                     |
| <b>U<sub>iso</sub> (Å<sup>2</sup>) O</b>     | 0.027 (0.0045)                             | 0.027 (0.005)                                                      | 0.026 (0.0052)                                                     |
| <b>O pos</b>                                 | -0.75 (0.0012)                             |                                                                    |                                                                    |
|                                              |                                            |                                                                    | 0.25 (0.0063)                                                      |
|                                              |                                            |                                                                    | 0.51 (0.0042)                                                      |
|                                              |                                            |                                                                    | 0.14 (0.0051)                                                      |
|                                              |                                            |                                                                    | 0.14 (0.0037)                                                      |
|                                              |                                            |                                                                    | 0.87 (0.0045)                                                      |
|                                              |                                            |                                                                    | 0.63 (0.0038)                                                      |
|                                              |                                            |                                                                    | 0.26 (0.0037)                                                      |
|                                              |                                            |                                                                    | 0.62 (0.012)                                                       |
| <b>Lattice par., a (Å)</b>                   | 8.30 (0.0075)                              | 8.39 (0.013)                                                       | 8.39 (0.015)                                                       |
| <b>Lattice par., c (Å)</b>                   |                                            | 8.10 (0.025)                                                       | 8.10 (0.028)                                                       |
| <b>δ<sub>2</sub> (Å<sup>2</sup>)</b>         | 3.40 (0.37)                                | 3.05 (0.26)                                                        | 3.32 (0.4)                                                         |
| <b>Sp-diameter (Å)</b>                       | 23.1 (0.86)                                | 25.3 (1.2)                                                         | 24.8 (1.1)                                                         |
| <b>Occ(Td)</b>                               |                                            | 0.81 (0.045)                                                       | 0.87 (0.055)                                                       |

## References

1. C. Farrow, P. Juhas, J. Liu, D. Bryndin, E. Božin, J. Bloch, T. Proffen and S. Billinge, *Journal of Physics: Condensed Matter*, 2007, **19**, 335219.
